# Supplementary material
Source: PubMed Central journal article supplement (PMC5588665)

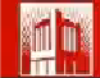

H<sub>2</sub>O present  
attracted to IR

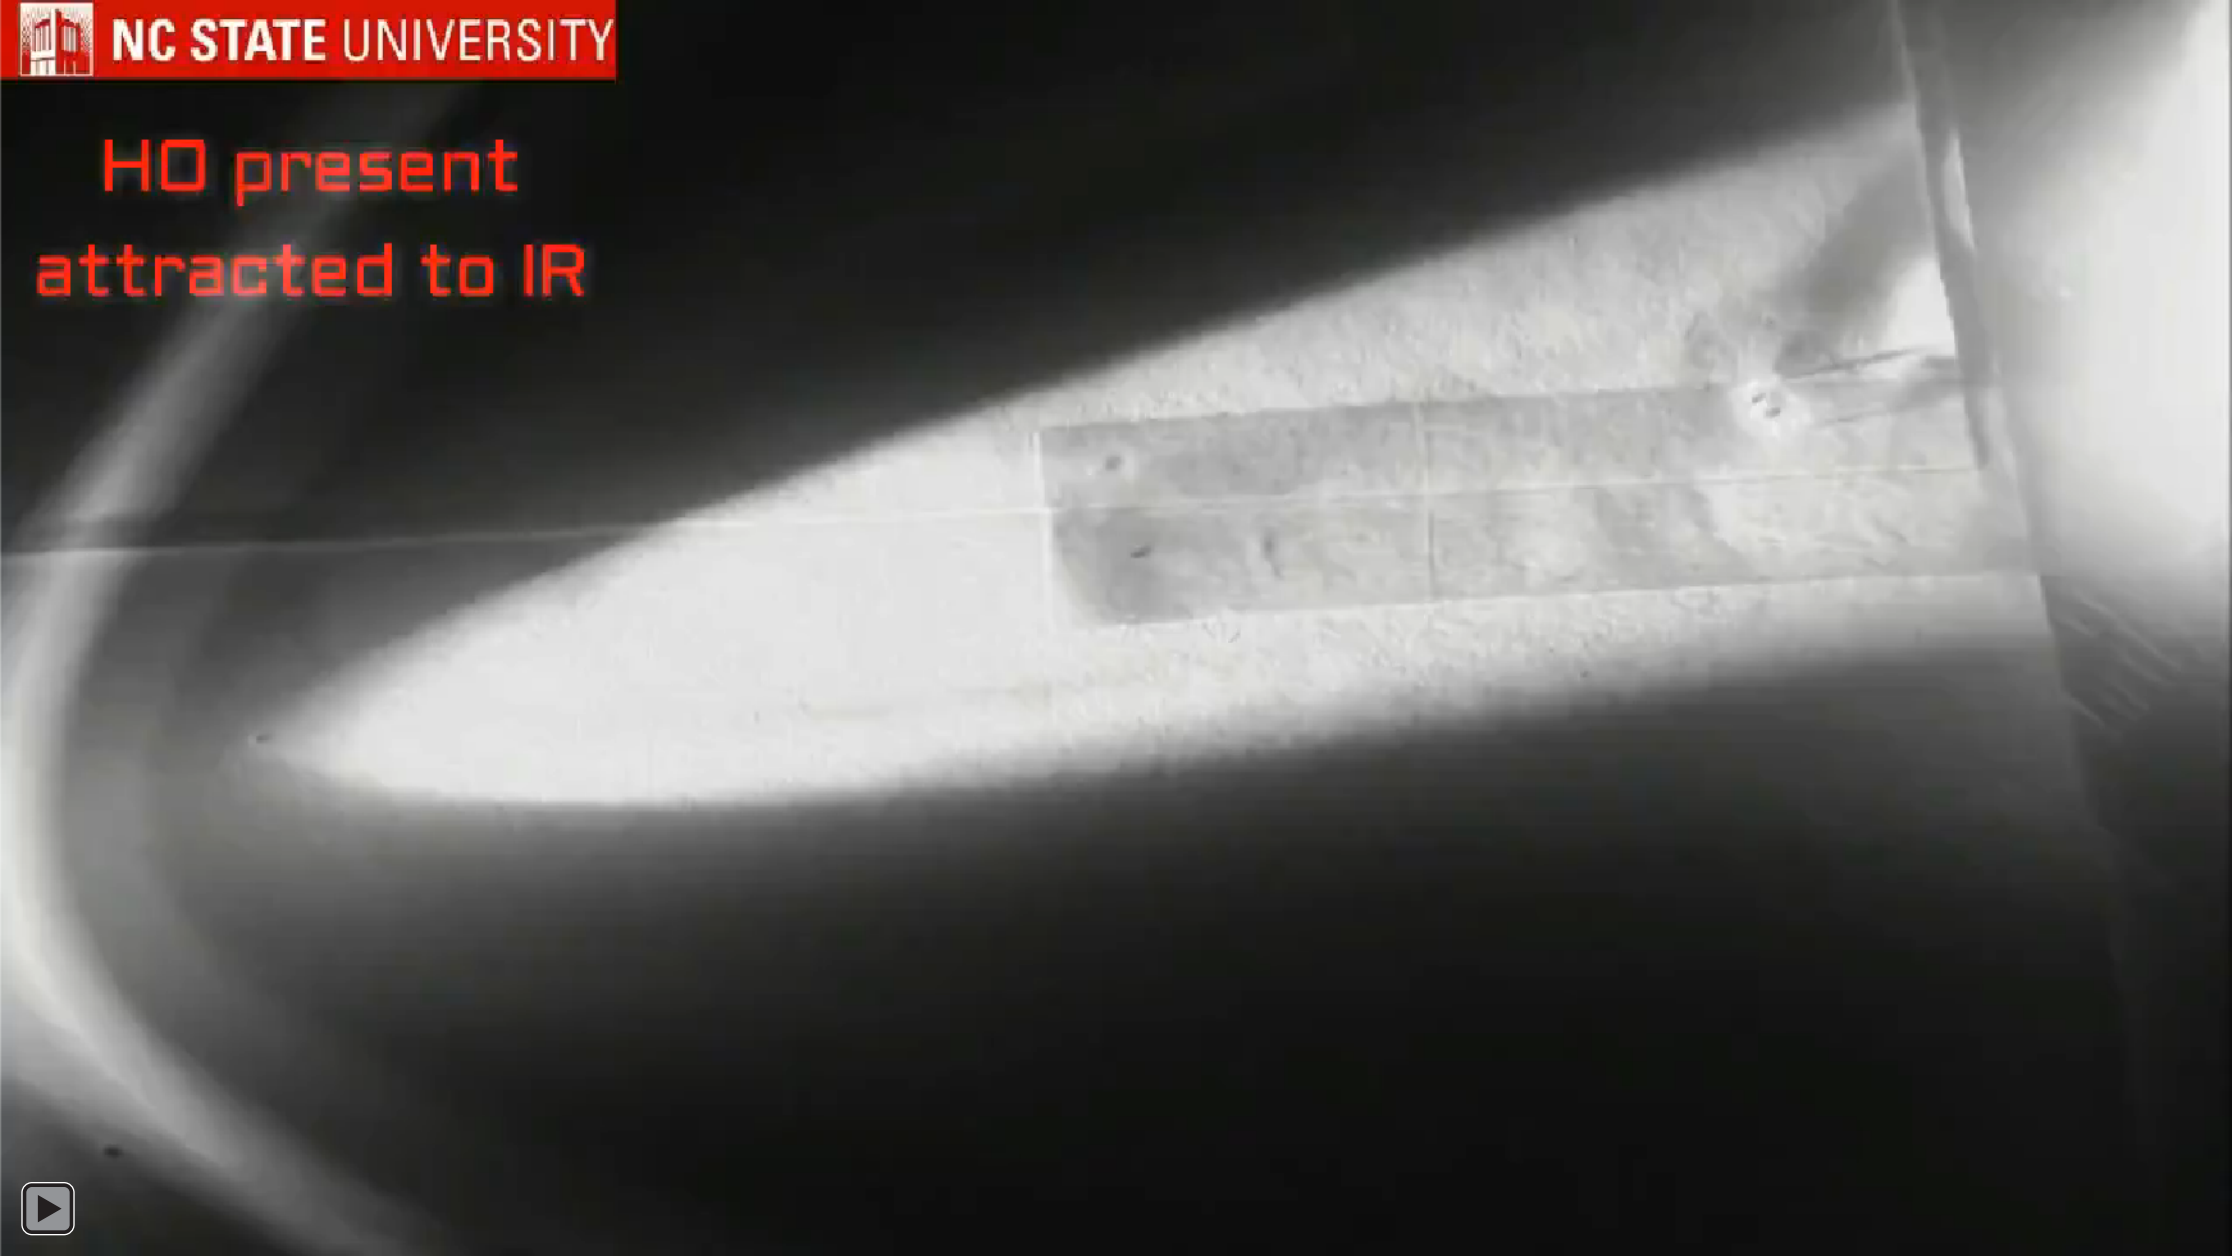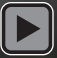

Supplement: NIHMS887305-supplement-1.pdf [file NIHMS887305-supplement-1.pdf]
